# Supplementary material
Source: Springer Nature journal article supplement (https://www.springermedizin.de/resource/supplementary/12914_2013_278_MOESM1_ESM.pdf/9537208)

November-December 2010 October 2010

December 2011 + April 2012

August 2012  
September 2010

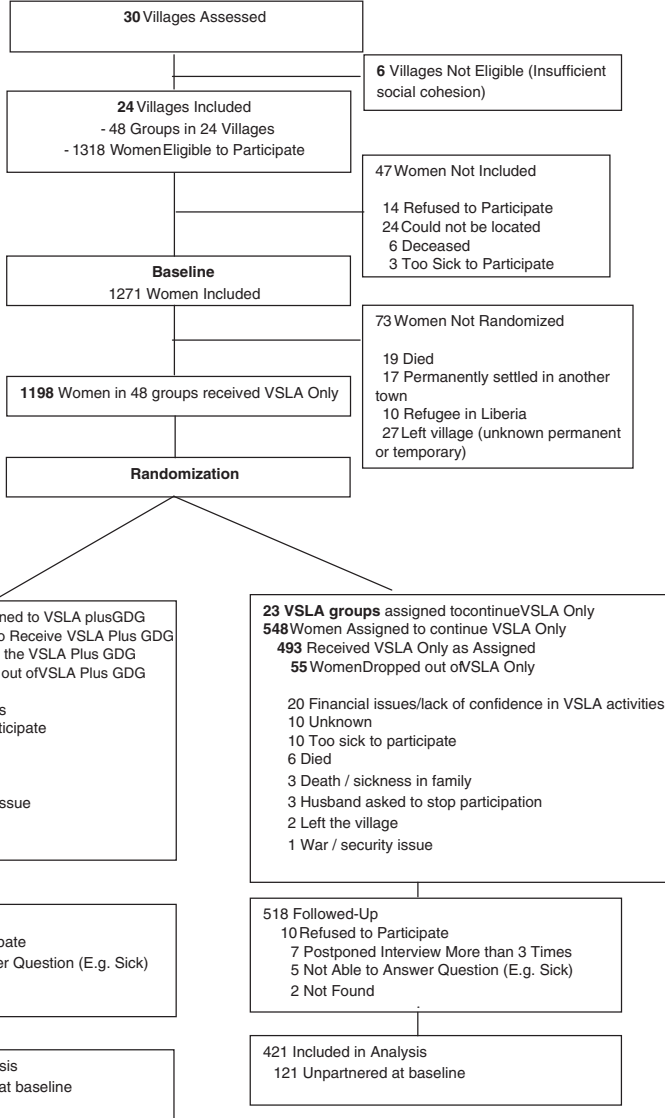

Supplement: MOESM1 [file 9537208]
